# Supplementary material for: Controlling helical chirality of cobalt complexes by chirality transfer from vicinal diamines
Source: Royal Society of Chemistry journal article supplement (doi:10.1039/c3cc46887a), 2013-01-01
Supplement: c3cc46887a.pdf [file c3cc46887a.pdf]

## Supporting Information

# Controlling Helical Chirality of Cobalt Complexes by Chirality Transfer with Vicinal Diamines

Min-Seob Seo, Kiseong Kim and Hyunwoo Kim\*

<sup>1</sup>*Department of Chemistry, Korea Advanced Institute of Science and Technology (KAIST), Daejeon 305-701, Republic of Korea*

<sup>2</sup>*Center for Nanomaterials and Chemical Reactions, Institute for Basic Science (IBS), Daejeon 305-701, Republic of Korea*

### Table of contents

|     |                                                             |      |
|-----|-------------------------------------------------------------|------|
| I   | General Information                                         | S-2  |
| II  | Experimental Procedures                                     | S-2  |
| III | Reactions between [Co- <b>3</b> ]OTs and Chiral Diamines    | S-5  |
| IV  | CD Spectra                                                  | S-8  |
| V   | Asymmetric Coordination Chemistry                           | S-9  |
| VI  | Calculation Results                                         | S-12 |
| VII | Crystal Structure of [Co- <b>3</b> -( <i>rac</i> )-dpen]OTs | S-16 |
| IX  | NMR Spectra                                                 | S-18 |
| X   | References                                                  | S-23 |

## I. General Information

Commercially available compounds were used without further purification or drying. The  $^1\text{H}$  and  $^{13}\text{C}$  NMR spectra were recorded on a Bruker Ascend 400 spectrometer (400 MHz for  $^1\text{H}$  and 100 MHz for  $^{13}\text{C}$ ) and are reported in ppm, relative to residual protonated solvent peak (DMSO- $d_6$ ). The high-resolution mass spectra (HRMS) were obtained on a Jeol JMS700 spectrometer at the Korea Basic Science Center, Daegu, Korea. Circular dichroism (CD) and UV-vis spectra were performed on a JASCO J-815 spectrometer at the KAIST Research Analyst Center. All calculations were performed using Gaussian 09. *Rac*-, (*R,R*)-, and (*S,S*)-1,2-diphenylethylenediamines were purchased and 1,2-bis(2,4,6-trimethylphenyl)ethylenediamine was prepared from hpen (mother diamine) by the diaza-Cope rearrangement.<sup>[1]</sup>

## II. Experimental Procedures

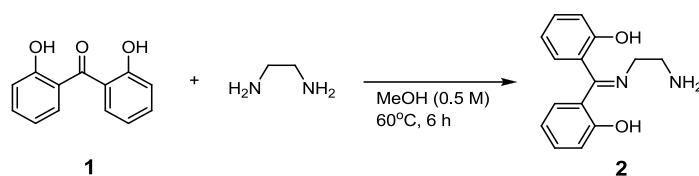

To a stirred solution of 2,2'-dihydroxybenzophenone (**1**, 10.0 g, 46.7 mmol)<sup>[2]</sup> in methanol (93 mL) was added 2 equiv of ethylenediamine (6.24 mL, 93.4 mmol) at 25 °C. Heating the reaction mixture at 60 °C for 6 h afforded the product as a yellow precipitate. After allowed to ambient temperature, the mixture was mixed with diethyl ether (93 mL), and stirred for additional 1 h. The resulting cloudy solution was then filtered and washed with diethyl ether to give the product **2** as a yellow solid (10.2 g, 85% yield).

Yellow solid;  $^1\text{H}$  NMR (400 MHz, DMSO- $d_6$ )  $\delta$  7.31 (ddd,  $J = 8.3, 7.3, 1.8$  Hz, 1H), 7.25 (ddd,  $J = 8.4, 7.1, 1.8$  Hz, 1H), 7.03 (dd,  $J = 7.5, 1.8$  Hz, 1H), 6.95 (dd,  $J = 8.2, 0.8$  Hz, 1H), 6.91 (td,  $J = 7.4, 1.0$  Hz, 1H), 6.85 (dd,  $J = 8.3, 1.0$  Hz, 1H), 6.75 (dd,  $J = 7.9, 1.7$  Hz, 1H), 6.64 (ddd,  $J = 8.1, 7.2, 1.2$  Hz, 1H), 4.49 (br, 3H), 3.32 (td,  $J = 6.4, 0.8$  Hz, 2H), 2.81 (td,  $J = 6.4, 2.5$  Hz, 2H);  $^{13}\text{C}$  NMR (100 MHz, DMSO- $d_6$ )  $\delta$  173.0, 163.0, 154.5, 132.1, 130.7, 130.5, 128.5, 120.7, 119.4, 118.7, 117.5, 117.0, 116.6, 54.2, 41.8; HRMS (EI)  $m/z$  calcd for C<sub>15</sub>H<sub>16</sub>N<sub>2</sub>O<sub>2</sub> [M]<sup>+</sup>: 256.1212, found : 256.1214.

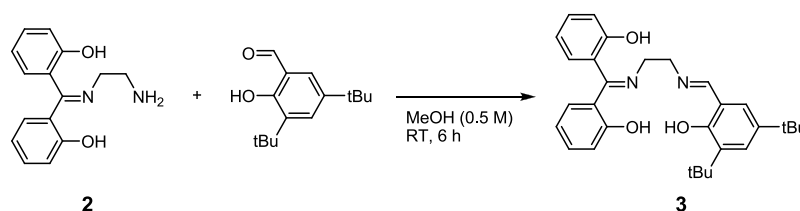

To a stirred suspension of **2** (5.08g, 19.8 mmol) in methanol (40 mL) was added 1.2 equiv of 3,5-di-tert-butyl-2-hydroxybenzaldehyde (5.57 g, 23.8 mmol) and the resulting mixture was stirred for 6 h at 25 °C. After adding diethyl ether (40 mL), the mixture was stirred for additional 1 h. The resulting solution was then filtered and washed with diethyl ether to give the product **3** as a yellow solid (7.84 g, 84%).

Yellow solid; <sup>1</sup>H NMR (400 MHz, DMSO-d<sub>6</sub>) δ 15.34 (s, 1H), 13.88 (br, 1H), 9.96 (br, 1H), 8.59 (s, 1H), 7.34 (ddd, *J* = 8.3, 7.3, 1.8 Hz, 1H), 7.31 (d, *J* = 2.4 Hz, 1H), 7.25 (m, 2H), 7.01(m, 2H), 6.91 (td, *J* = 7.4, 0.9 Hz, 1H), 6.85 (dd, *J* = 8.3, 1.0 Hz, 1H), 6.77 (dd, *J* = 8.0, 1.7 Hz, 1H), 6.66 (m, 1H), 3.87 (m, 2H), 3.62 (m, 2H), 1.38 (s, 9H), 1.26 (s, 9H); <sup>13</sup>C NMR (100 MHz, DMSO-d<sub>6</sub>) δ 173.0, 168.1, 162.2, 157.5, 153.8, 139.5, 135.6, 132.2, 130.7, 130.7, 128.4, 126.4, 126.2, 120.3, 119.5, 119.1, 117.7, 117.4, 117.3, 115.9, 58.8, 51.8, 34.6, 33.8, 31.3, 29.2; HRMS (EI) *m/z* calcd for C<sub>30</sub>H<sub>36</sub>N<sub>2</sub>O<sub>3</sub> [M]<sup>+</sup>: 472.2726, found : 472.2722.

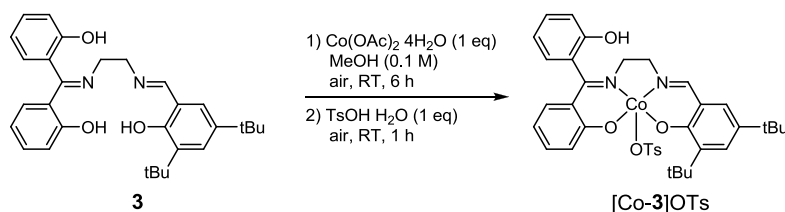

To a stirred suspension of **3** (2.36 g, 5 mmol) in methanol (50 mL) was added Co(OAc)<sub>2</sub>•4H<sub>2</sub>O (1.25 g, 5 mmol). After stirring at 25 °C for 6 h, p-toluenesulfonic acid monohydrate (TsOH•H<sub>2</sub>O) (951 mg, 5 mmol) was added and the mixture was stirred for 30 min at the atmospheric environment. All volatiles were removed under reduced pressure and further dried in a vacuum oven overnight at 60 °C to give the product [Co-**3**]OTs as a dark green solid (3.33 g, 95%).

Dark green solid; <sup>1</sup>H NMR (400 MHz, DMSO-d<sub>6</sub>) δ 10.08 (s, 1H), 8.20 (s, 1H), 7.51 (dd, *J* = 8.4, 0.8 Hz, 1H), 7.48 - 7.46 (m, 3H), 7.40 (d, *J* = 2.8 Hz, 1H), 7.35 (m, 1H), 7.27 (d, *J* = 2.4 Hz, 1H), 7.11 - 7.01 (m, 5H), 6.87 (dd, *J* = 7.6, 1.6 Hz, 1H), 6.50 (m, 1H), 4.12 (m, 2H), 3.73 (m, 2H), 2.28 (s, 3H), 1.73 (s, 9H), 1.28 (s, 9H); <sup>13</sup>C NMR (100 MHz, DMSO-d<sub>6</sub>) δ 173.9, 167.6, 166.1, 161.8, 153.6, 141.7, 137.3, 135.4, 133.3, 132.9, 130.8, 128.3, 127.8, 125.2, 123.6, 121.8, 120.1, 119.2, 117.7, 116.0, 114.7, 57.6, 55.1, 35.3, 33.2, 31.2, 30.0, 20.5; HRMS (FAB) *m/z* calcd for C<sub>30</sub>H<sub>34</sub>N<sub>2</sub>O<sub>3</sub>Co<sup>+</sup> : 529.1901, found : 529.1900.

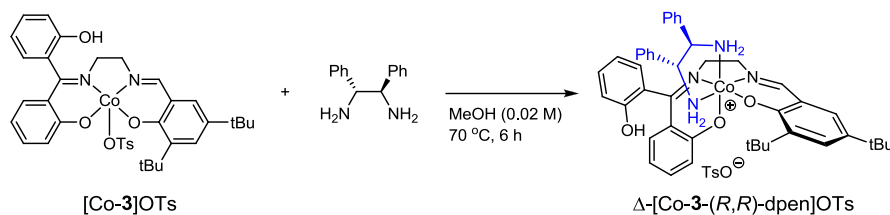

To a stirred solution of [Co-3]OTs (210 mg, 0.3 mmol) in methanol (3 mL) was added (*R,R*)-1,2-diphenylethylenediamine (dpen) (64 mg, 0.3 mmol), and the mixture was stirred for 6 h at 70 °C. Aliquot <sup>1</sup>H NMR indicated full conversion and the product ratio of 7:1. The pure major Δ-[Co-3-(*R,R*)-dpen]OTs was obtained by slow addition of pentane (36 mL) to a crude mixture (274 mg) dissolved in EtOH (4 mL). After stored in a refrigerator at 5 °C for 3 h, the solution were filtrated to give the pure Δ-[Co-3-(*R,R*)-dpen]OTs as a brown solid.

Brown solid (55 mg, 20%); <sup>1</sup>H NMR (400 MHz, DMSO-*d*<sub>6</sub>) δ 11.01 (br, 1H), 8.36 (s, 1H), 7.53 (t, *J* = 7.2 Hz, 1H), 7.47 (d, *J* = 8.3 Hz, 2H), 7.36 (d, *J* = 2.6 Hz, 1H), 7.25 - 7.06 (m, 15H), 6.98 (m, 1H), 6.84 (m, 2H), 6.69 (dd, *J* = 8.8, 0.8, 1H), 6.45 (t, *J* = 7.2 Hz, 1H), 6.10 (m, 1H), 5.10 (m, 1H), 4.35 (m, 1H), 4.02 (m, 3H), 3.88 (m, 2H), 3.61 (m, 1H), 3.52 (m, 1H), 2.28 (s, 3H), 1.54 (s, 9H), 1.30 (s, 9H); <sup>13</sup>C NMR (100 MHz, DMSO-*d*<sub>6</sub>) δ 171.3, 168.8, 168.7, 161.7, 155.8, 145.8, 141.0, 138.3, 137.5, 136.7, 134.8, 134.3, 132.7, 132.6, 131.2, 128.9, 128.5, 128.4, 128.3, 128.3, 128.2, 128.0, 127.3, 125.7, 125.5, 122.8, 121.2, 119.5, 118.3, 116.1, 115.0, 64.9, 63.4, 59.9, 57.3, 35.3, 33.5, 31.4, 30.2, 20.8; HRMS (FAB) *m/z* calcd for C<sub>44</sub>H<sub>50</sub>N<sub>4</sub>O<sub>3</sub>Co<sup>+</sup> : 741.3209, found : 741.3218.

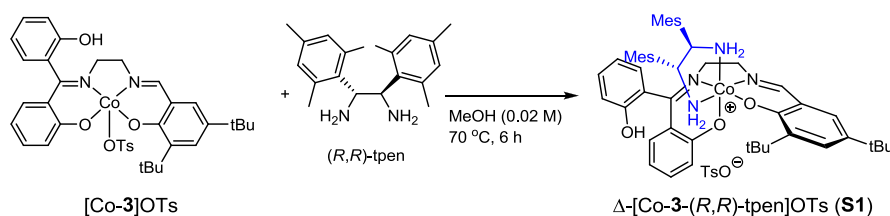

Brown solid (84 mg, 28%); <sup>1</sup>H NMR (400 MHz, DMSO-*d*<sub>6</sub>) δ 10.82 (br, 1H), 8.37 (s, 1H), 7.50 - 7.46 (m, 3H), 7.36 (d, *J* = 2.6 Hz, 1H), 7.28 (d, *J* = 2.4 Hz, 1H), 7.19 (d, *J* = 8.4 Hz, 1H), 7.15 - 7.09 (m, 3H), 6.91 (t, *J* = 8.0 Hz, 1H), 6.81 (dd, *J* = 8.0, 1.2 Hz, 1H), 6.77 - 6.70 (m, 4H), 6.65 - 6.60 (m, 2H), 6.54 (t, *J* = 7.6 Hz, 1H), 5.87 (m, 1H), 5.43 (m, 1H), 4.85 (m, 1H), 4.64 (m, 1H), 4.43 (m, 2H), 3.98 (m, 1H), 3.79 (m, 1H), 3.60 (m, 1H), 3.01 (m, 1H), 2.46 (s, 3H), 2.35 (s, 3H), 2.28 (s, 3H), 2.08 (s, 6H), 1.96 (s, 3H), 1.90 (s, 3H), 1.50 (s, 9H), 1.31 (s, 9H); <sup>13</sup>C NMR (100 MHz, DMSO-*d*<sub>6</sub>) δ 171.7, 169.5, 169.0, 161.2, 145.7, 141.1, 138.0, 137.5, 137.5, 137.2, 137.1, 135.5, 134.9, 134.6, 133.9, 133.1, 132.9, 132.0, 131.1, 130.7, 129.7, 129.5, 129.4, 129.1, 128.8, 128.7, 128.0, 126.6, 125.5, 122.7, 120.4, 119.2, 116.2, 115.2, 59.1, 58.8, 57.6, 56.4, 35.4, 33.6, 31.3, 30.4, 20.9, 20.9, 20.8, 20.8, 20.4, 20.2, 20.1; HRMS (FAB) *m/z* calcd for C<sub>50</sub>H<sub>62</sub>N<sub>4</sub>O<sub>3</sub>Co<sup>+</sup> : 825.4148, found : 825.4150.

### III. Reactions between [Co-3]OTs and Chiral Diamines

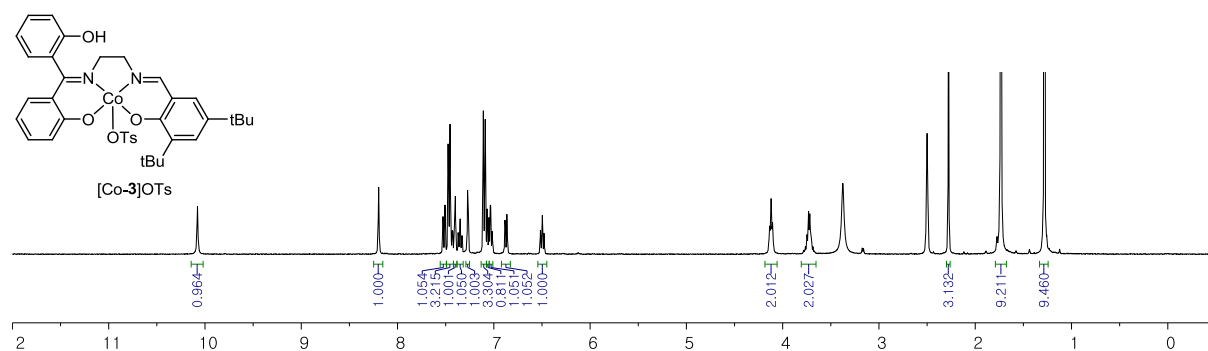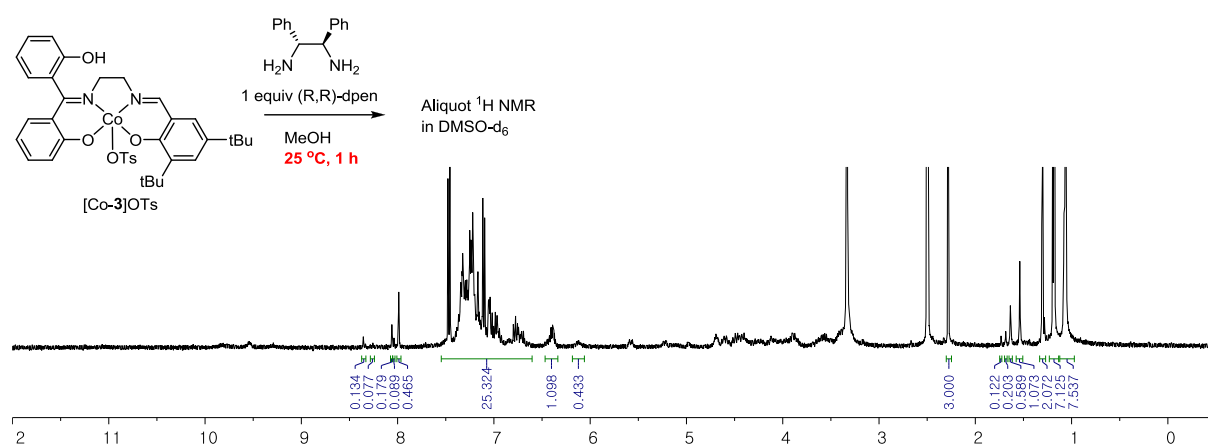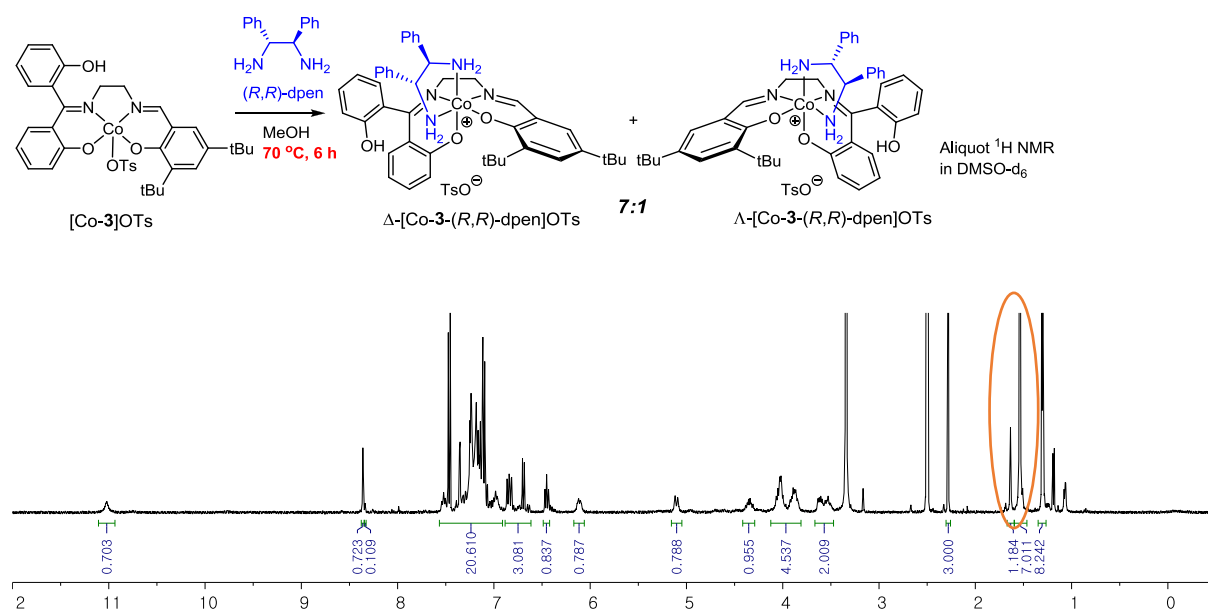

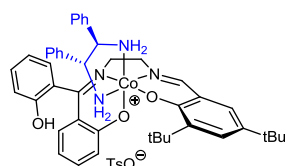

$\Delta$ -[Co-3-(R,R)-dpen]OTs  
Recrystallized

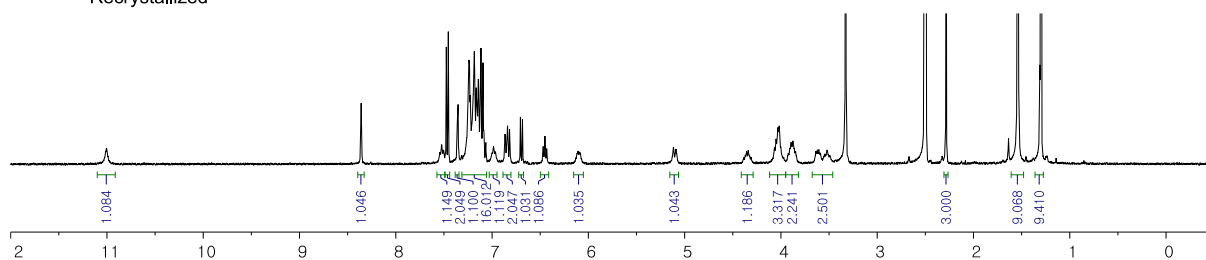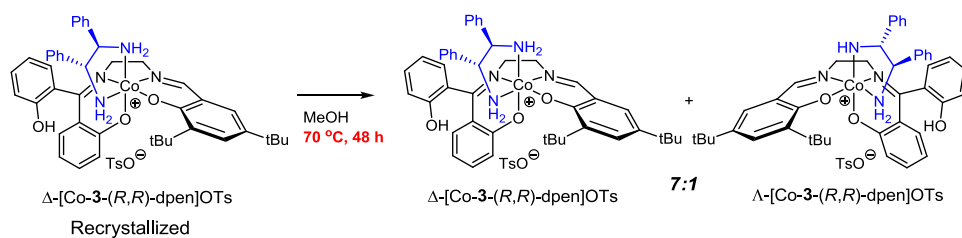

Aliquot  $^1\text{H}$  NMR  
in DMSO- $d_6$

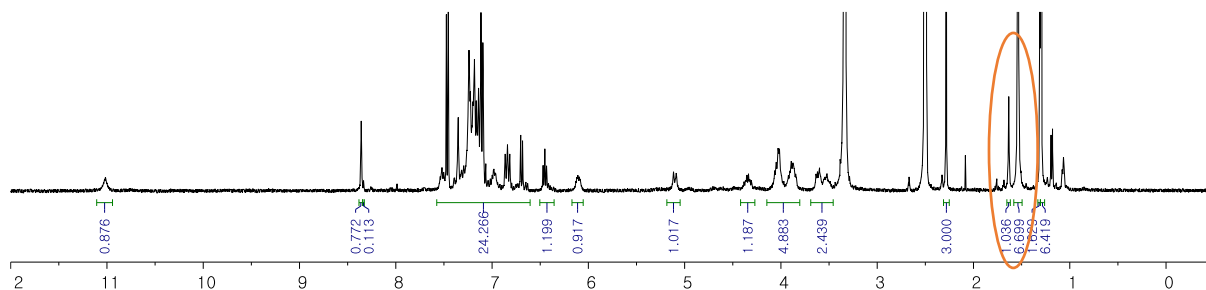

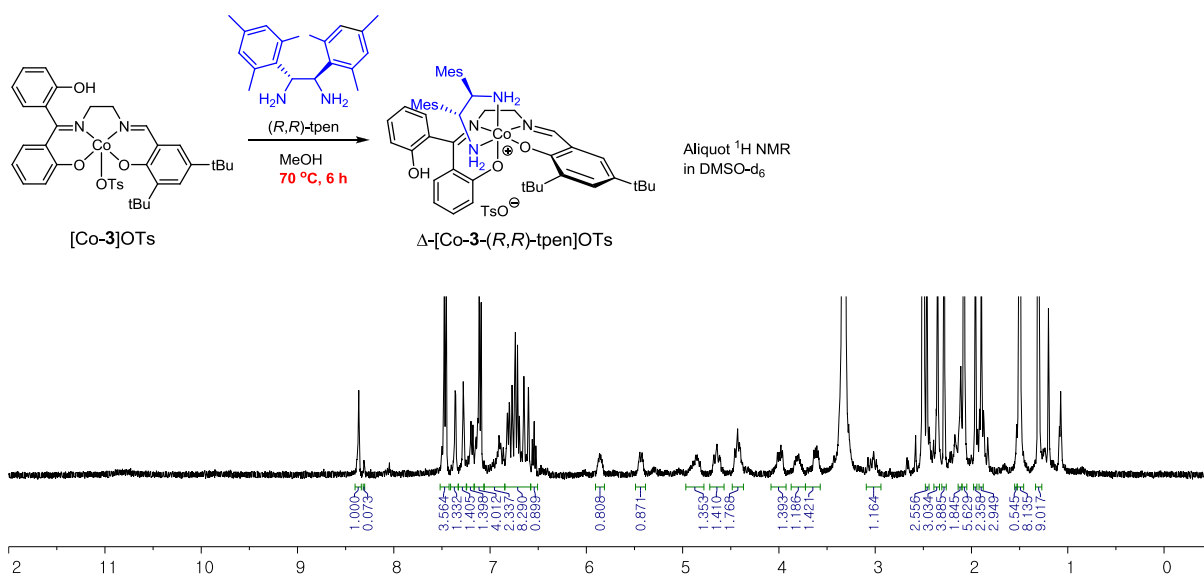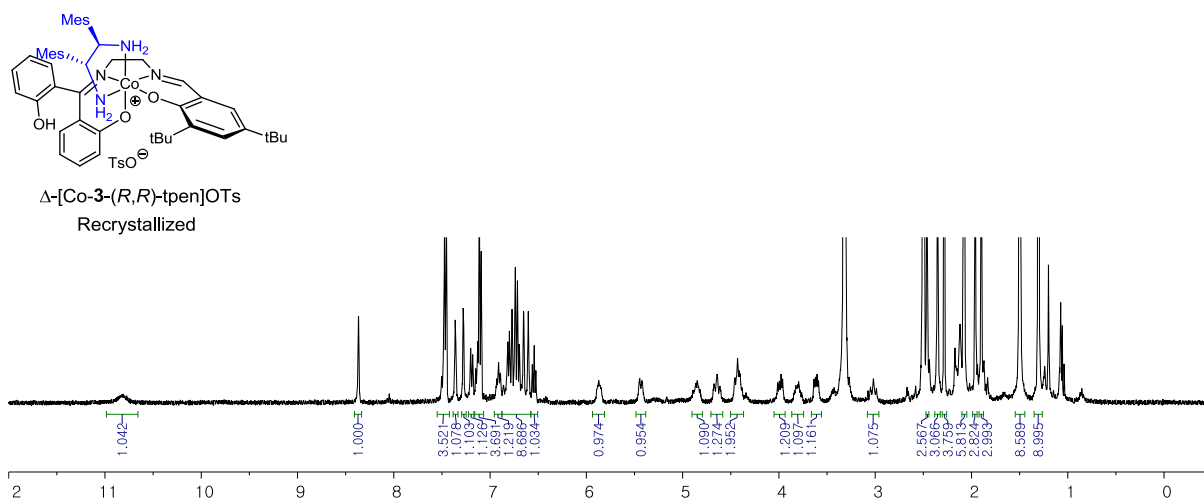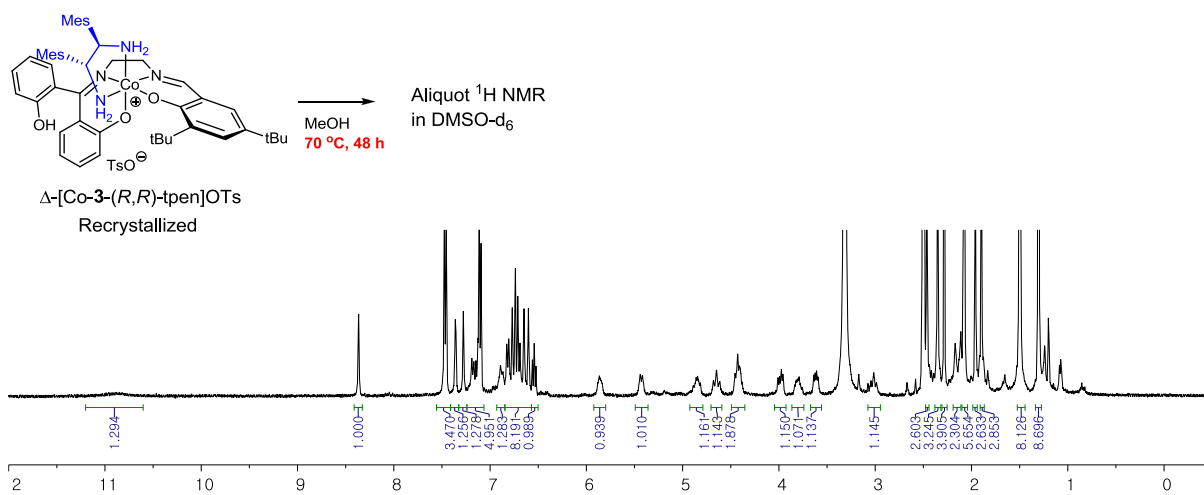

## IV. CD Spectra

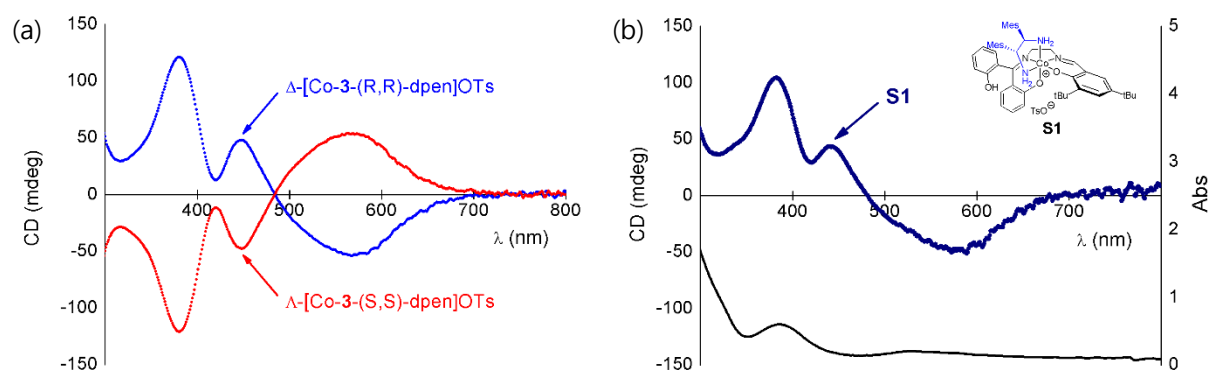

**Figure S1.** Circular dichroism spectra of recrystallized (a)  $\Delta$ -[Co-3-(R,R)-dpen]OTs and  $\Lambda$ -[Co-3-(S,S)-dpen]OTs and (b)  $\Delta$ -[Co-3-(R,R)-tpen]OTs (S1) (100  $\mu$ M in acetonitrile, 10 mm cell, at 20 °C).

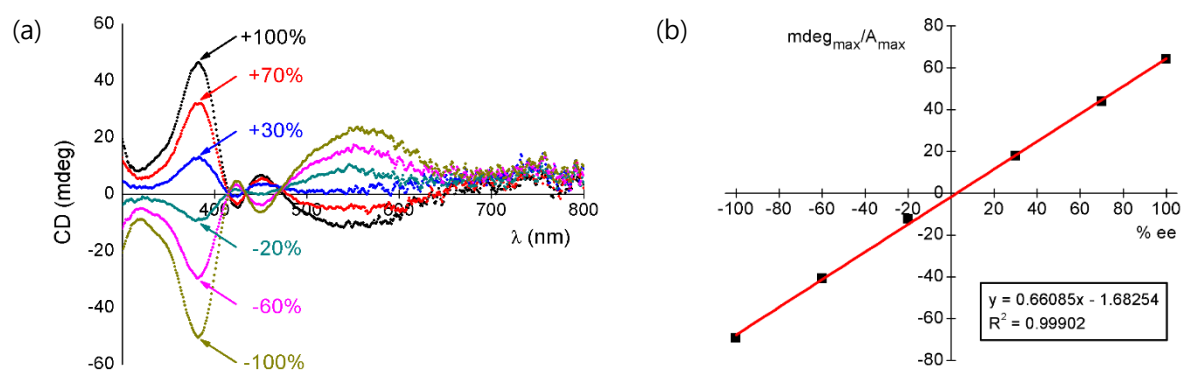

**Figure S2.** (a) Circular dichroism spectra of [Co-3-dpen]OTs with varied enantiopurities of dpen and (b) a linear plot between CD/UV-vis ratios and enantiopurities of dpen. (100  $\mu$ M in acetonitrile, 10 mm cell, at 20 °C).



## V. Asymmetric Coordination Chemistry

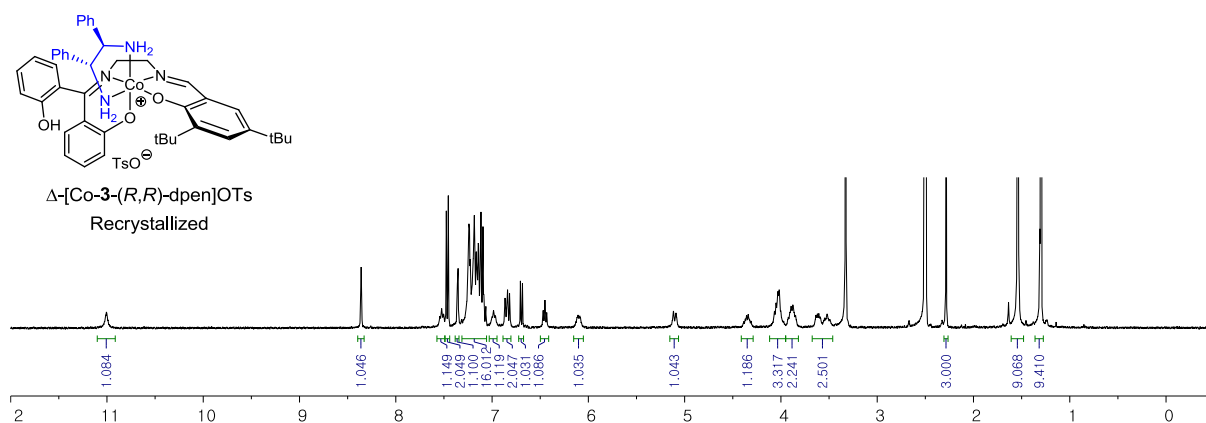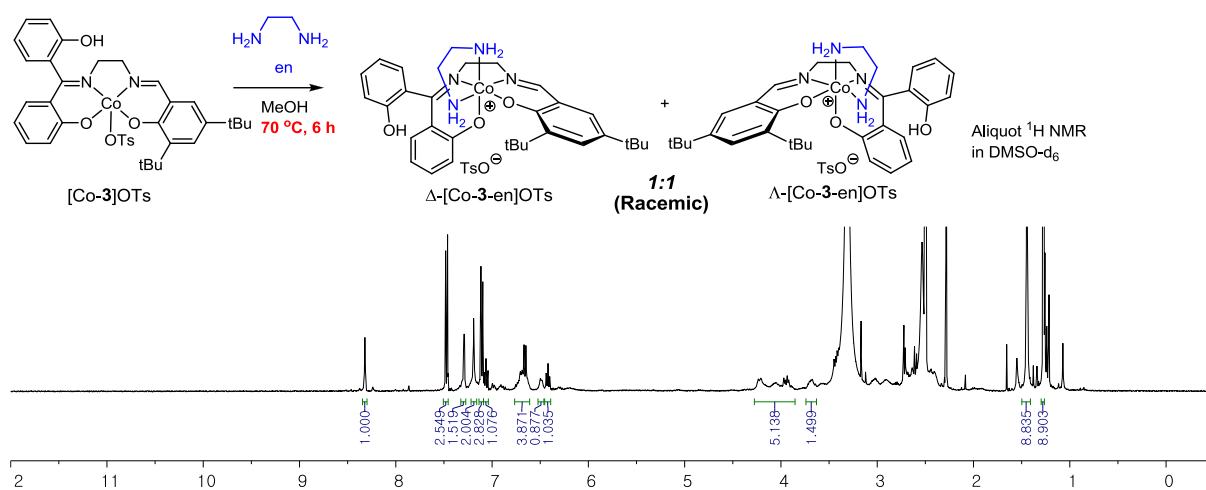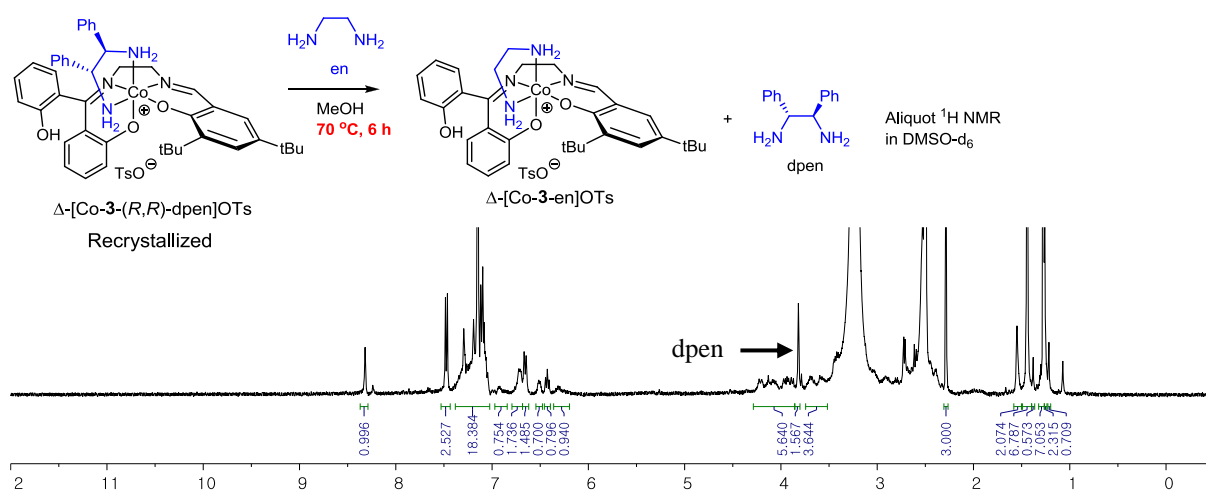

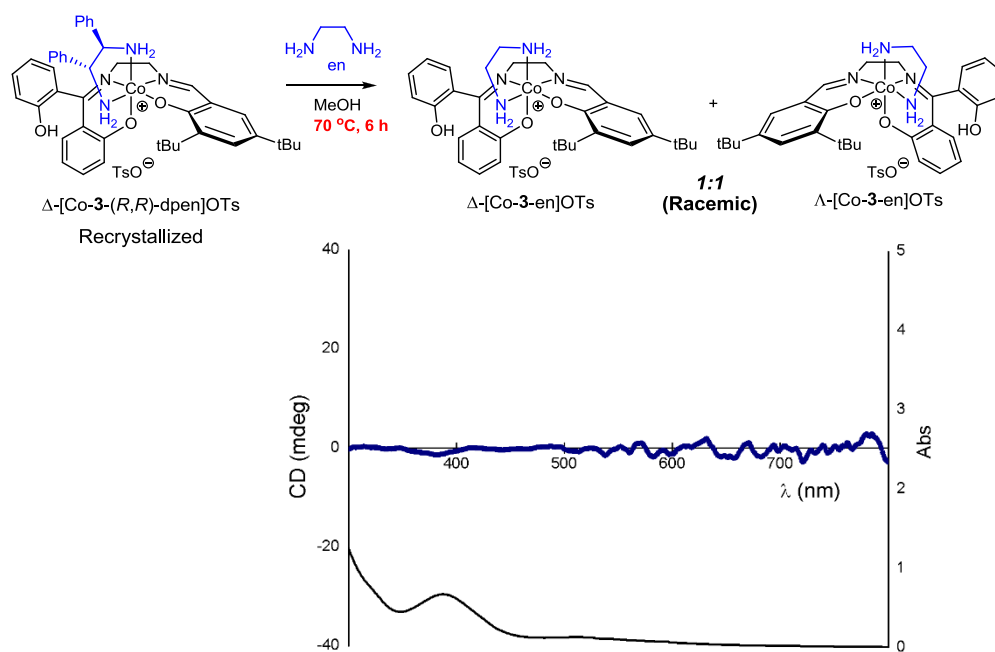

**Figure S3.** Circular dichroism spectrum of [Co-3-en]OTs prepared from  $\Delta$ -[Co-3-(*R,R*)-dpen]OTs (100  $\mu$ M in acetonitrile, 10 mm cell, at 20 °C) and its UV-vis spectrum.

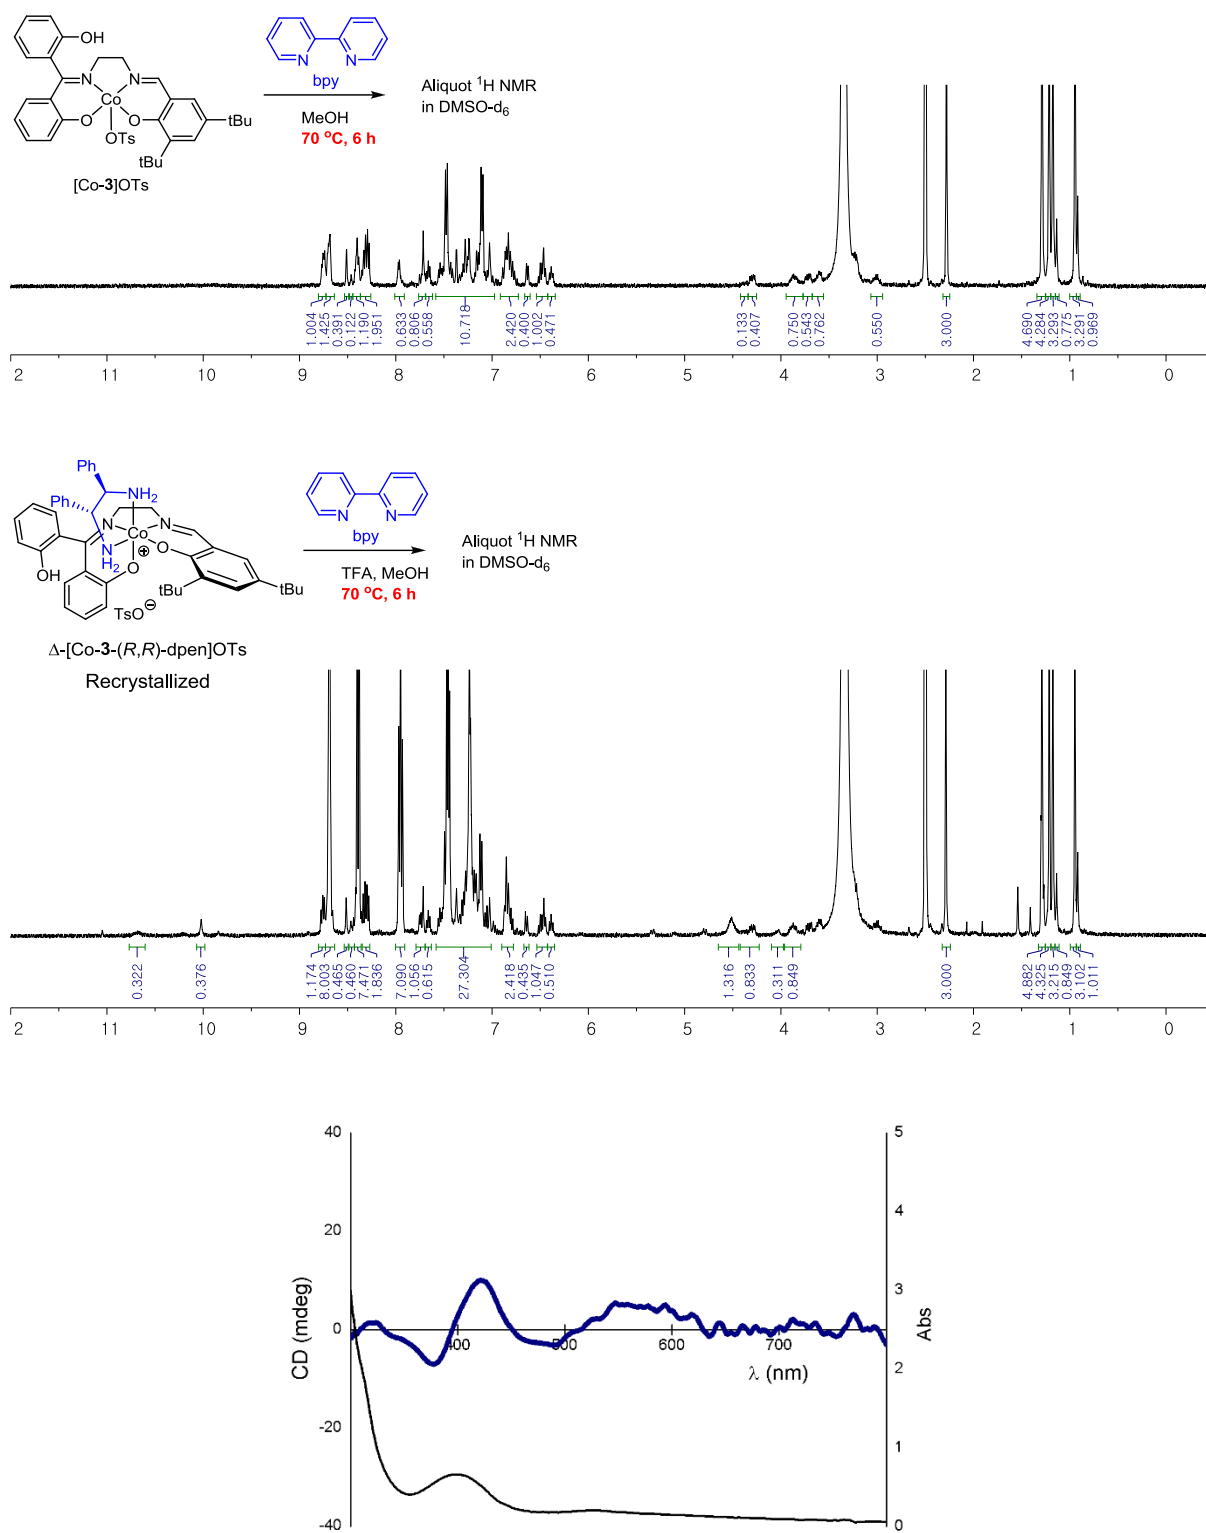

**Figure S4.** Circular dichroism spectrum of [Co-3-bpy]OTs prepared from Δ-[Co-3-(R,R)-dpen]OTs (100 μM in acetonitrile, 10 mm cell, at 20 °C) and its UV-vis spectrum.

## VI. Calculation Results

The Gaussian 09 was used for all calculations. We used B3LYP/ 6-31G(d,p) basis for C, H, N and O and LANL2DZ for Co.

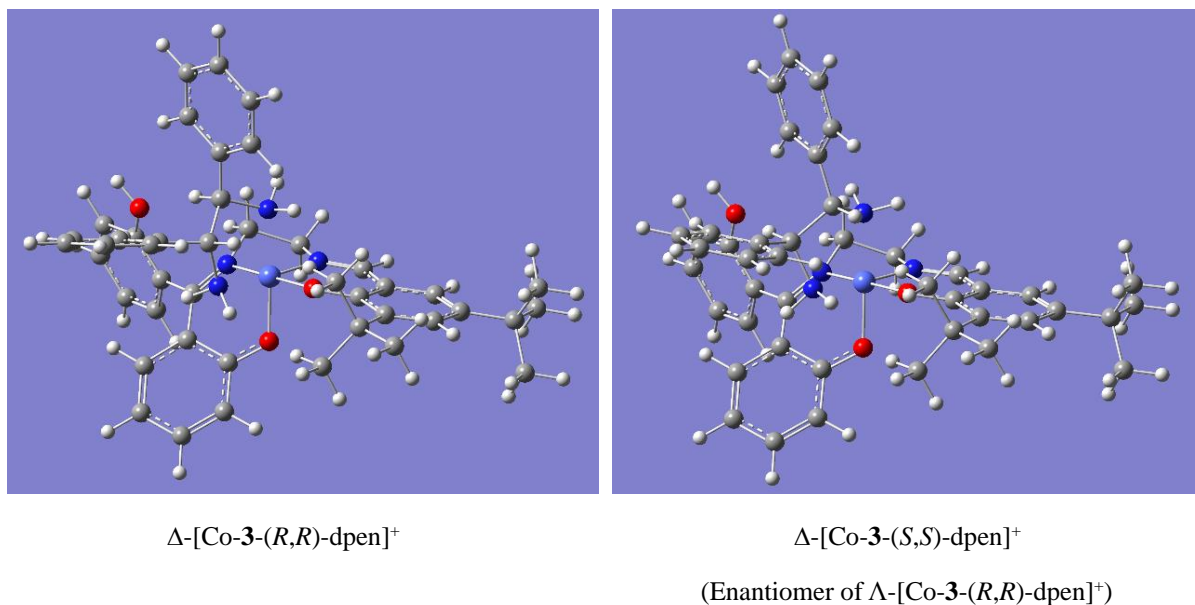

| Molecule                                          | E<br>(hartree) | E + ZPVE<br>(hartree) | $G_{298K}$<br>(hartree) | Imaginary Frequency<br>(cm <sup>-1</sup> ) |
|---------------------------------------------------|----------------|-----------------------|-------------------------|--------------------------------------------|
| $\Delta$ -[Co-3-( <i>R,R</i> )-dpen] <sup>+</sup> | -2296.53567290 | -2295.673060          | -2295.755018            | -                                          |
| $\Delta$ -[Co-3-( <i>S,S</i> )-dpen] <sup>+</sup> | -2296.53437244 | -2295.671454          | -2295.753156            | -                                          |

### Simulated CD Spectra

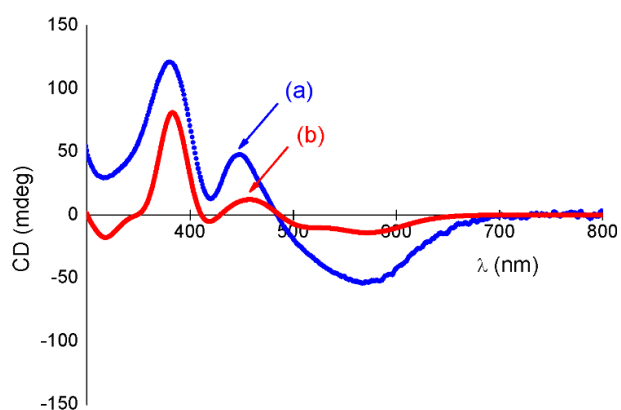

**Figure S5.** (a) Circular dichroism spectrum of recrystallized  $\Delta$ -[Co-3-(*R,R*)-dpen]OTs and (b) simulated circular dichroism spectrum of  $\Delta$ -[Co-3-(*R,R*)-dpen]<sup>+</sup> by TD-DFT calculation (Gaussian 09 TD-SCF, B3LYP/ 6-31G(d,p) basis for C, H, N and O and LANL2DZ for Co and CD spectra were generated using the program SpecDis v. 1.61).

### Cartesian Coordinates of Calculated Compounds

$\Delta$ -[Co-3-(*R,R*)-dpen]<sup>+</sup>

| Coordinates (Angstroms) |    |        |        |        |    |   |        |        |        |
|-------------------------|----|--------|--------|--------|----|---|--------|--------|--------|
| ATOM                    | X  | Y      | Z      |        |    |   |        |        |        |
| 1                       | Co | 0.055  | -0.569 | -0.238 | 39 | C | 3.989  | 0.473  | 0.809  |
| 2                       | N  | 0.907  | -1.548 | -1.631 | 40 | H | 4.714  | -2.085 | -2.069 |
| 3                       | N  | -1.544 | -1.473 | -0.859 | 41 | H | 6.099  | 0.525  | 1.003  |
| 4                       | O  | 0.277  | -1.951 | 1.021  | 42 | O | 1.66   | 0.274  | 0.351  |
| 5                       | C  | -2.39  | -2.12  | -0.093 | 43 | N | -0.886 | 0.581  | 1.106  |
| 6                       | C  | -2.109 | -2.31  | 1.318  | 44 | H | -1.751 | 0.136  | 1.412  |
| 7                       | C  | -1.502 | -3.121 | 3.938  | 45 | H | -0.268 | 0.613  | 1.916  |
| 8                       | C  | -0.739 | -2.313 | 1.766  | 46 | N | -0.182 | 1.048  | -1.41  |
| 9                       | C  | -3.137 | -2.673 | 2.231  | 47 | H | -0.263 | 0.881  | -2.411 |
| 10                      | C  | -2.849 | -3.055 | 3.525  | 48 | H | 0.709  | 1.525  | -1.261 |
| 11                      | C  | -0.475 | -2.767 | 3.085  | 49 | C | -1.319 | 1.888  | -0.925 |
| 12                      | H  | -4.167 | -2.644 | 1.893  | 50 | H | -2.226 | 1.319  | -1.15  |
| 13                      | H  | -3.647 | -3.314 | 4.212  | 51 | C | -1.159 | 1.97   | 0.61   |
| 14                      | H  | 0.563  | -2.805 | 3.401  | 52 | H | -0.257 | 2.55   | 0.822  |
| 15                      | H  | -1.266 | -3.443 | 4.949  | 53 | C | 3.746  | 1.466  | 1.967  |
| 16                      | C  | -3.618 | -2.737 | -0.676 | 54 | C | 5.061  | 1.944  | 2.617  |
| 17                      | C  | -5.943 | -3.908 | -1.733 | 55 | H | 4.827  | 2.634  | 3.434  |
| 18                      | C  | -3.886 | -4.105 | -0.495 | 56 | H | 5.701  | 2.481  | 1.91   |
| 19                      | C  | -4.55  | -1.96  | -1.394 | 57 | H | 5.635  | 1.117  | 3.045  |
| 20                      | C  | -5.708 | -2.546 | -1.912 | 58 | C | 3.016  | 2.729  | 1.448  |
| 21                      | C  | -5.029 | -4.695 | -1.027 | 59 | H | 2.848  | 3.434  | 2.27   |
| 22                      | H  | -3.177 | -4.703 | 0.067  | 60 | H | 2.052  | 2.473  | 1.006  |
| 23                      | H  | -6.424 | -1.935 | -2.455 | 61 | H | 3.62   | 3.239  | 0.689  |
| 24                      | H  | -5.21  | -5.755 | -0.887 | 62 | C | 2.911  | 0.78   | 3.077  |
| 25                      | H  | -6.844 | -4.352 | -2.144 | 63 | H | 2.691  | 1.493  | 3.88   |
| 26                      | C  | -1.425 | -1.729 | -2.296 | 64 | H | 3.467  | -0.055 | 3.514  |
| 27                      | H  | -2.181 | -2.43  | -2.656 | 65 | H | 1.971  | 0.386  | 2.687  |
| 28                      | H  | -1.544 | -0.796 | -2.857 | 66 | C | 7.079  | -1.153 | -0.874 |
| 29                      | C  | -0.015 | -2.315 | -2.479 | 67 | C | 7.224  | -2.186 | -2.007 |
| 30                      | H  | 0.295  | -2.289 | -3.531 | 68 | H | 6.743  | -3.137 | -1.756 |
| 31                      | H  | -0.024 | -3.361 | -2.149 | 69 | H | 8.283  | -2.392 | -2.186 |
| 32                      | C  | 2.193  | -1.665 | -1.758 | 70 | H | 6.799  | -1.822 | -2.949 |
| 33                      | H  | 2.557  | -2.315 | -2.559 | 71 | C | 7.745  | -1.734 | 0.396  |
| 34                      | C  | 3.2    | -1.036 | -0.964 | 72 | H | 7.245  | -2.654 | 0.715  |
| 35                      | C  | 5.276  | 0.092  | 0.45   | 73 | H | 7.718  | -1.031 | 1.234  |
| 36                      | C  | 2.893  | -0.1   | 0.076  | 74 | H | 8.796  | -1.97  | 0.199  |
| 37                      | C  | 4.546  | -1.371 | -1.27  | 75 | C | 7.82   | 0.138  | -1.298 |
| 38                      | C  | 5.605  | -0.824 | -0.581 | 76 | H | 7.783  | 0.905  | -0.518 |
|                         |    |        |        |        | 77 | H | 7.381  | 0.563  | -2.207 |
|                         |    |        |        |        | 78 | H | 8.875  | -0.077 | -1.499 |

|     |   |        |        |        |    |   |        |        |        |
|-----|---|--------|--------|--------|----|---|--------|--------|--------|
| 79  | O | -4.292 | -0.621 | -1.554 | 15 | H | -1.319 | -3.099 | 5.2    |
| 80  | H | -5.043 | -0.211 | -2.003 | 16 | C | -3.756 | -2.721 | -0.415 |
| 81  | C | -2.336 | 2.614  | 1.318  | 17 | C | -6.134 | -3.901 | -1.336 |
| 82  | C | -4.491 | 3.79   | 2.678  | 18 | C | -4.076 | -4.052 | -0.097 |
| 83  | C | -3.628 | 2.078  | 1.201  | 19 | C | -4.663 | -1.984 | -1.205 |
| 84  | C | -2.139 | 3.742  | 2.122  | 20 | C | -5.848 | -2.575 | -1.653 |
| 85  | C | -3.21  | 4.33   | 2.797  | 21 | C | -5.245 | -4.648 | -0.56  |
| 86  | C | -4.697 | 2.663  | 1.88   | 22 | H | -3.384 | -4.619 | 0.518  |
| 87  | H | -3.811 | 1.206  | 0.576  | 23 | H | -6.546 | -1.993 | -2.251 |
| 88  | H | -1.143 | 4.167  | 2.218  | 24 | H | -5.464 | -5.681 | -0.314 |
| 89  | H | -3.042 | 5.206  | 3.415  | 25 | H | -7.056 | -4.348 | -1.696 |
| 90  | H | -5.693 | 2.241  | 1.784  | 26 | C | -1.546 | -1.955 | -2.134 |
| 91  | H | -5.324 | 4.244  | 3.205  | 27 | H | -2.316 | -2.679 | -2.408 |
| 92  | C | -1.393 | 3.238  | -1.612 | 28 | H | -1.659 | -1.091 | -2.798 |
| 93  | C | -1.552 | 5.722  | -2.912 | 29 | C | -0.147 | -2.575 | -2.271 |
| 94  | C | -2.539 | 3.594  | -2.332 | 30 | H | 0.146  | -2.675 | -3.323 |
| 95  | C | -0.323 | 4.145  | -1.55  | 31 | H | -0.161 | -3.575 | -1.82  |
| 96  | C | -0.402 | 5.378  | -2.197 | 32 | C | 2.078  | -1.843 | -1.703 |
| 97  | C | -2.621 | 4.828  | -2.977 | 33 | H | 2.415  | -2.544 | -2.473 |
| 98  | H | -3.376 | 2.902  | -2.382 | 34 | C | 3.11   | -1.158 | -0.993 |
| 99  | H | 0.58   | 3.899  | -0.994 | 35 | C | 5.233  | 0.017  | 0.306  |
| 100 | H | 0.432  | 6.07   | -2.141 | 36 | C | 2.837  | -0.186 | 0.023  |
| 101 | H | -3.518 | 5.091  | -3.53  | 37 | C | 4.445  | -1.495 | -1.343 |
| 102 | H | -1.612 | 6.683  | -3.413 | 38 | C | 5.528  | -0.921 | -0.716 |

$\Delta$ -[Co-3-(*S,S*)-dpen]<sup>+</sup>

|    |      | Coordinates (Anstroms) |        |        |    |   |        |        |        |
|----|------|------------------------|--------|--------|----|---|--------|--------|--------|
|    | ATOM | X                      | Y      | Z      |    |   |        |        |        |
| 1  | Co   | -0.017                 | -0.636 | -0.196 | 39 | C | 3.959  | 0.401  | 0.706  |
| 2  | N    | 0.797                  | -1.729 | -1.53  | 40 | H | 4.587  | -2.236 | -2.124 |
| 3  | N    | -1.645                 | -1.549 | -0.73  | 41 | H | 6.075  | 0.464  | 0.819  |
| 4  | O    | 0.189                  | -1.941 | 1.147  | 42 | O | 1.616  | 0.199  | 0.324  |
| 5  | C    | -2.501                 | -2.098 | 0.099  | 43 | N | -0.89  | 0.636  | 1.062  |
| 6  | C    | -2.201                 | -2.188 | 1.517  | 44 | H | -1.513 | 0.182  | 1.729  |
| 7  | C    | -1.565                 | -2.839 | 4.174  | 45 | H | -0.098 | 1.01   | 1.588  |
| 8  | C    | -0.821                 | -2.216 | 1.935  | 46 | N | -0.235 | 0.889  | -1.506 |
| 9  | C    | -3.221                 | -2.44  | 2.474  | 47 | H | -0.882 | 0.667  | -2.26  |
| 10 | C    | -2.918                 | -2.742 | 3.786  | 48 | H | 0.676  | 1.043  | -1.937 |
| 11 | C    | -0.544                 | -2.59  | 3.277  | 49 | C | 3.758  | 1.408  | 1.86   |
| 12 | H    | -4.257                 | -2.389 | 2.157  | 50 | C | 5.095  | 1.883  | 2.467  |
| 13 | H    | -3.709                 | -2.916 | 4.506  | 51 | H | 4.889  | 2.578  | 3.286  |
| 14 | H    | 0.498                  | -2.647 | 3.573  | 52 | H | 5.717  | 2.412  | 1.738  |
|    |      |                        |        |        | 53 | H | 5.677  | 1.054  | 2.883  |
|    |      |                        |        |        | 54 | C | 3.026  | 2.671  | 1.346  |
|    |      |                        |        |        | 55 | H | 2.878  | 3.384  | 2.165  |
|    |      |                        |        |        | 56 | H | 2.053  | 2.417  | 0.923  |
|    |      |                        |        |        | 57 | H | 3.614  | 3.172  | 0.57   |

|    |   |        |        |        |     |   |        |       |        |
|----|---|--------|--------|--------|-----|---|--------|-------|--------|
| 58 | C | 2.951  | 0.74   | 3.001  | 100 | H | -0.833 | 6.258 | -3.059 |
| 59 | H | 2.754  | 1.465  | 3.799  | 101 | H | -3.932 | 3.42  | -3.969 |
| 60 | H | 3.52   | -0.088 | 3.437  | 102 | H | -2.882 | 5.642 | -4.325 |
| 61 | H | 2.001  | 0.339  | 2.646  |     |   |        |       |        |
| 62 | C | 6.991  | -1.248 | -1.058 |     |   |        |       |        |
| 63 | C | 7.099  | -2.301 | -2.177 |     |   |        |       |        |
| 64 | H | 6.635  | -3.251 | -1.89  |     |   |        |       |        |
| 65 | H | 8.153  | -2.503 | -2.392 |     |   |        |       |        |
| 66 | H | 6.635  | -1.957 | -3.108 |     |   |        |       |        |
| 67 | C | 7.707  | -1.803 | 0.197  |     |   |        |       |        |
| 68 | H | 7.224  | -2.72  | 0.551  |     |   |        |       |        |
| 69 | H | 7.706  | -1.084 | 1.023  |     |   |        |       |        |
| 70 | H | 8.752  | -2.036 | -0.034 |     |   |        |       |        |
| 71 | C | 7.709  | 0.039  | -1.531 |     |   |        |       |        |
| 72 | H | 7.697  | 0.819  | -0.764 |     |   |        |       |        |
| 73 | H | 7.234  | 0.445  | -2.43  |     |   |        |       |        |
| 74 | H | 8.756  | -0.175 | -1.768 |     |   |        |       |        |
| 75 | O | -4.359 | -0.68  | -1.503 |     |   |        |       |        |
| 76 | H | -5.108 | -0.287 | -1.971 |     |   |        |       |        |
| 77 | C | -0.691 | 2.15   | -0.823 |     |   |        |       |        |
| 78 | H | 0.208  | 2.598  | -0.393 |     |   |        |       |        |
| 79 | C | -1.615 | 1.72   | 0.335  |     |   |        |       |        |
| 80 | H | -2.506 | 1.247  | -0.089 |     |   |        |       |        |
| 81 | C | -2.046 | 2.857  | 1.243  |     |   |        |       |        |
| 82 | C | -2.881 | 4.932  | 2.939  |     |   |        |       |        |
| 83 | C | -3.407 | 3.14   | 1.406  |     |   |        |       |        |
| 84 | C | -1.104 | 3.627  | 1.942  |     |   |        |       |        |
| 85 | C | -1.52  | 4.657  | 2.786  |     |   |        |       |        |
| 86 | C | -3.824 | 4.172  | 2.247  |     |   |        |       |        |
| 87 | H | -4.146 | 2.55   | 0.869  |     |   |        |       |        |
| 88 | H | -0.04  | 3.431  | 1.836  |     |   |        |       |        |
| 89 | H | -0.782 | 5.245  | 3.322  |     |   |        |       |        |
| 90 | H | -4.883 | 4.38   | 2.363  |     |   |        |       |        |
| 91 | H | -3.203 | 5.734  | 3.596  |     |   |        |       |        |
| 92 | C | -1.319 | 3.131  | -1.794 |     |   |        |       |        |
| 93 | C | -2.446 | 4.942  | -3.619 |     |   |        |       |        |
| 94 | C | -2.477 | 2.792  | -2.51  |     |   |        |       |        |
| 95 | C | -0.735 | 4.385  | -2.003 |     |   |        |       |        |
| 96 | C | -1.296 | 5.288  | -2.908 |     |   |        |       |        |
| 97 | C | -3.035 | 3.691  | -3.419 |     |   |        |       |        |
| 98 | H | -2.955 | 1.825  | -2.358 |     |   |        |       |        |
| 99 | H | 0.16   | 4.661  | -1.452 |     |   |        |       |        |

## VII. Crystal Structure of [Co-3-(*rac*)-dpen]OTs

X-ray quality crystals for [Co-3-(*rac*)-dpen]OTs were obtained by slow diffusion of hexane to its solution in EtOH at 5 °C.

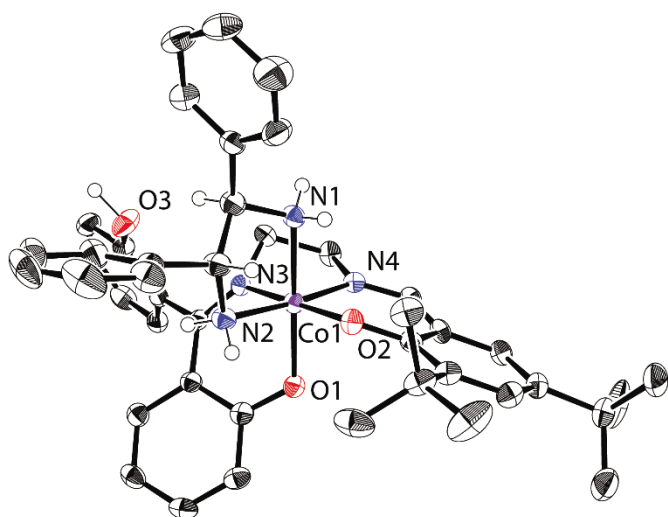

**Figure S6.** ORTEP representation (50% probability) of the crystal structure of  $\Delta$ -[Co-3-(*R,R*)-dpen]OTs. Its enantiomer  $\Lambda$ -[Co-3-(*S,S*)-dpen]OTs, tosylate, and solvent ethanol are not shown. All hydrogens except for those in dpen and phenols are omitted for clarity.

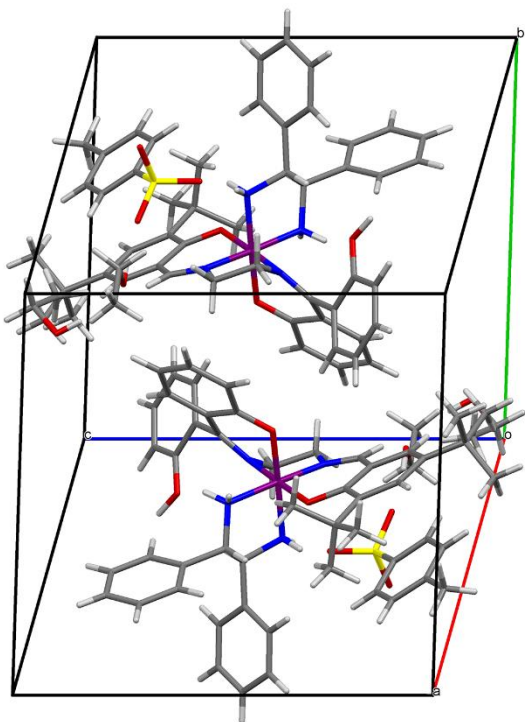

**Figure S7.** The unit-cell structure of [Co-3-(*rac*)-dpen]OTs.



|                                   |                                                                    |                           |
|-----------------------------------|--------------------------------------------------------------------|---------------------------|
| Empirical formula                 | C <sub>55</sub> H <sub>69</sub> Co N <sub>4</sub> O <sub>8</sub> S |                           |
| Formula weight                    | 1005.13                                                            |                           |
| Temperature                       | 147(2) K                                                           |                           |
| Wavelength                        | 0.71073 Å                                                          |                           |
| Crystal system                    | Triclinic                                                          |                           |
| Space group                       | P -1                                                               |                           |
| Unit cell dimensions              | a = 13.631(3) Å                                                    | $\alpha=98.858(5)^\circ$  |
|                                   | b = 14.137(3) Å                                                    | $\beta=95.100(5)^\circ$   |
|                                   | c = 14.402(3) Å                                                    | $\gamma=105.071(5)^\circ$ |
| Volume                            | 2623.6(10) Å <sup>3</sup>                                          |                           |
| Z                                 | 2                                                                  |                           |
| Density (calculated)              | 1.272 Mg/m <sup>3</sup>                                            |                           |
| Absorption coefficient            | 0.424 mm <sup>-1</sup>                                             |                           |
| F(000)                            | 1068                                                               |                           |
| Crystal size                      | 0.22 x 0.22 x 0.12 mm <sup>3</sup>                                 |                           |
| Theta range for data collection   | 1.52 to 27.55°.                                                    |                           |
| Index ranges                      | -17<=h<=17, -18<=k<=12, -18<=l<=18                                 |                           |
| Reflections collected             | 45043                                                              |                           |
| Independent reflections           | 11987 [R(int) = 0.0749]                                            |                           |
| Completeness to theta = 27.55°    | 98.90%                                                             |                           |
| Absorption correction             | Semi-empirical from equivalents                                    |                           |
| Max. and min. transmission        | 0.7456 and 0.6243                                                  |                           |
| Refinement method                 | Full-matrix least-squares on F <sup>2</sup>                        |                           |
| Data / restraints / parameters    | 11987 / 1 / 651                                                    |                           |
| Goodness-of-fit on F <sup>2</sup> | 1.016                                                              |                           |
| Final R indices [I>2sigma(I)]     | R1 = 0.0570, wR2 = 0.1228                                          |                           |
| R indices (all data)              | R1 = 0.1071, wR2 = 0.1430                                          |                           |
| Largest diff. peak and hole       | 0.968 and -0.536 e.Å <sup>-3</sup>                                 |                           |

## VIII. NMR Spectra

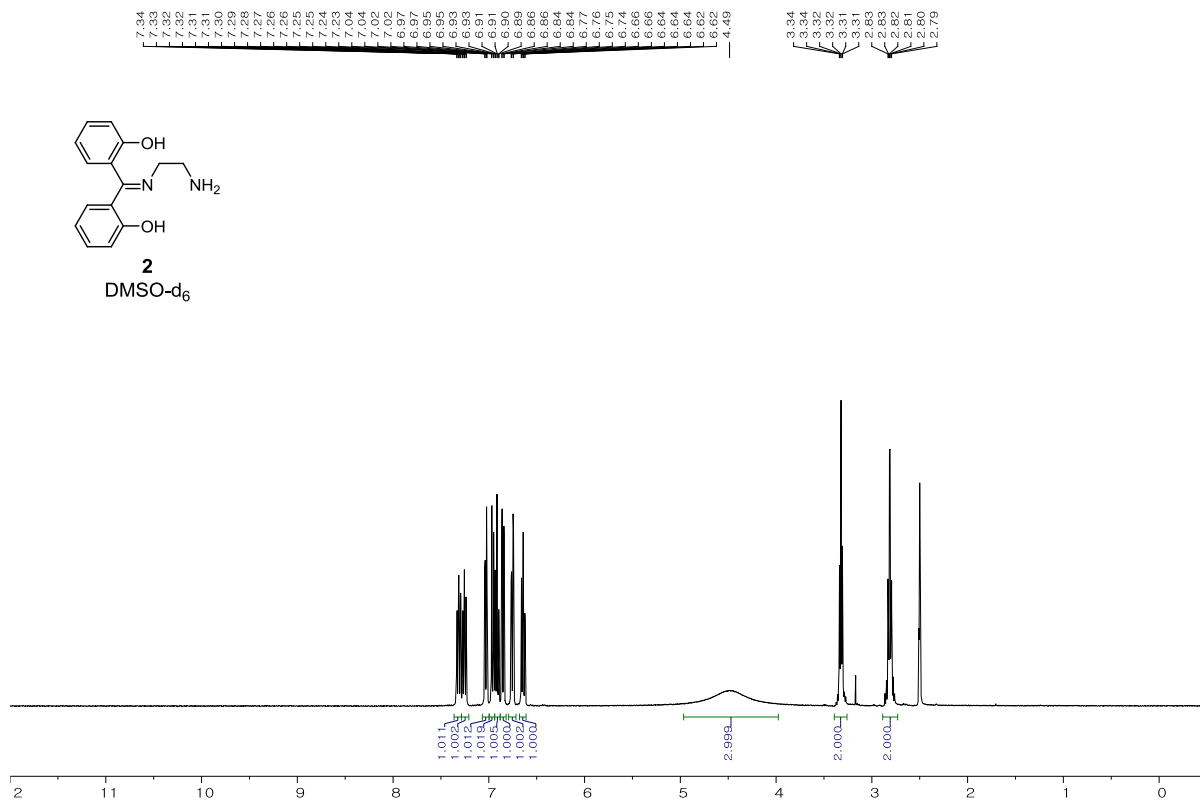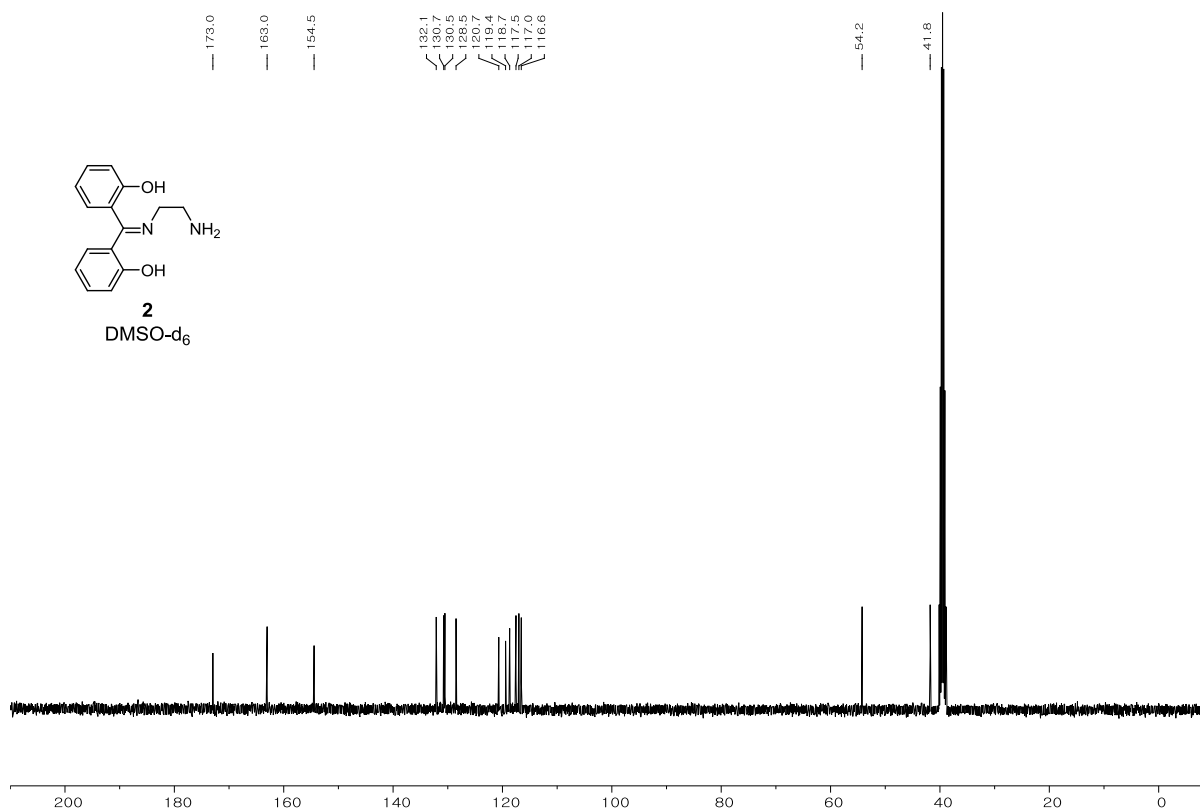

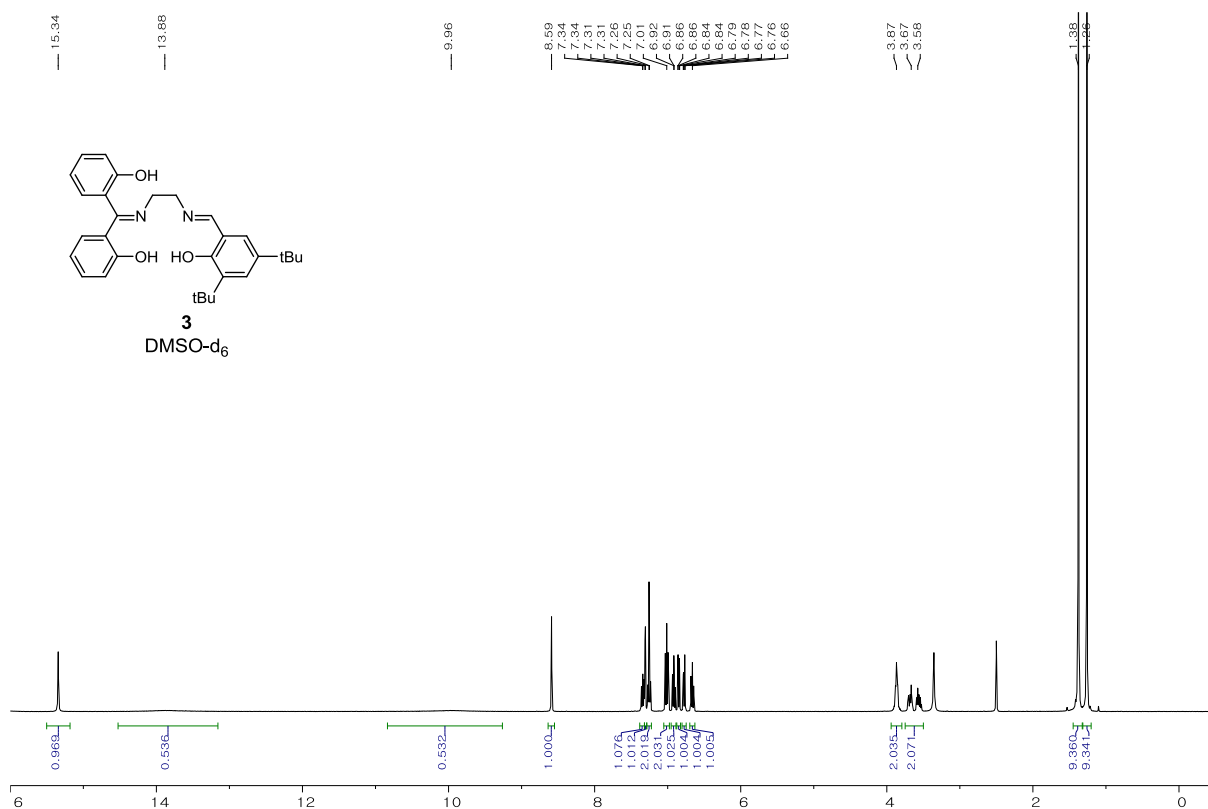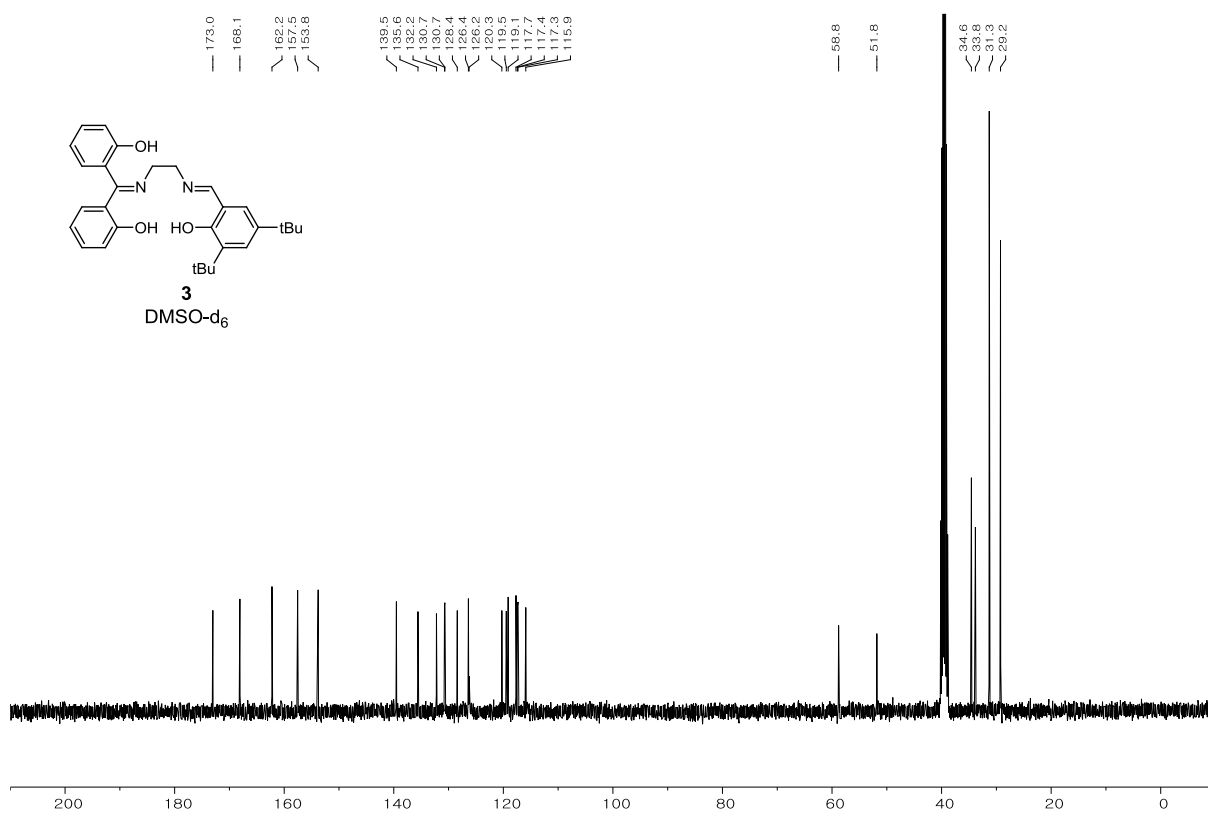

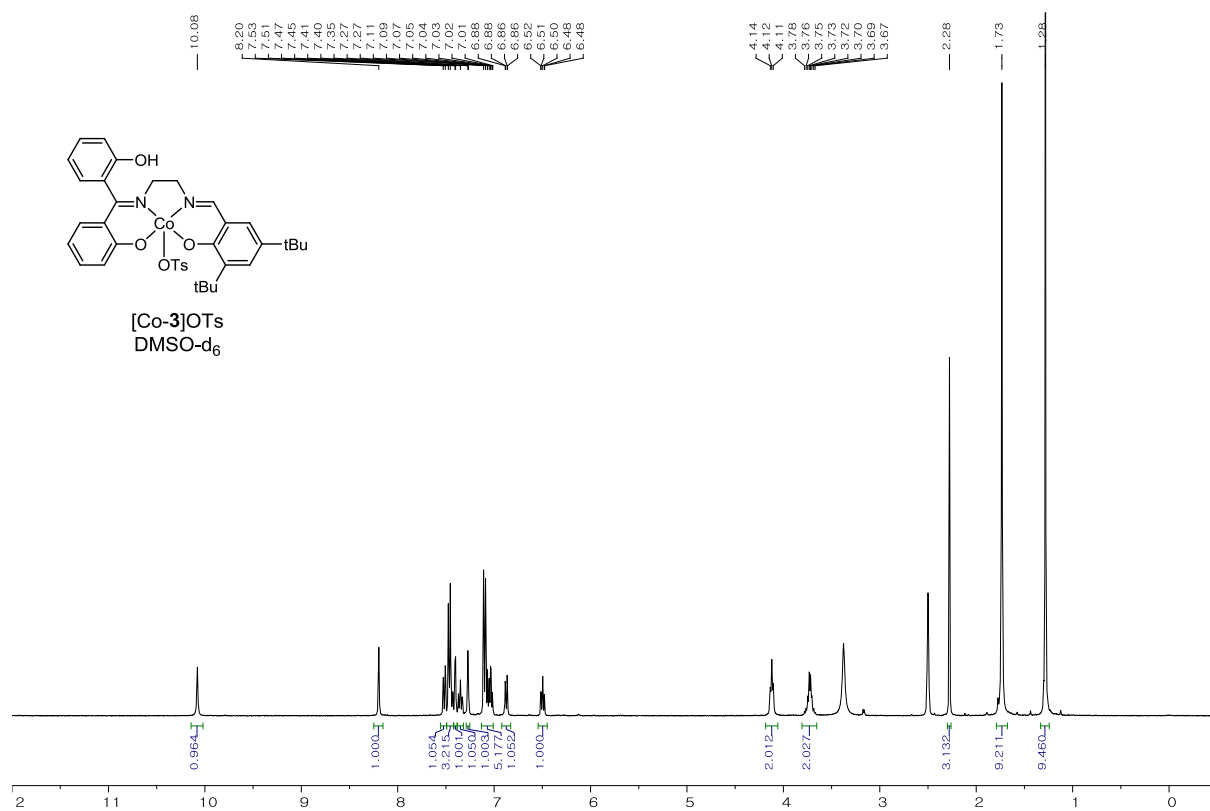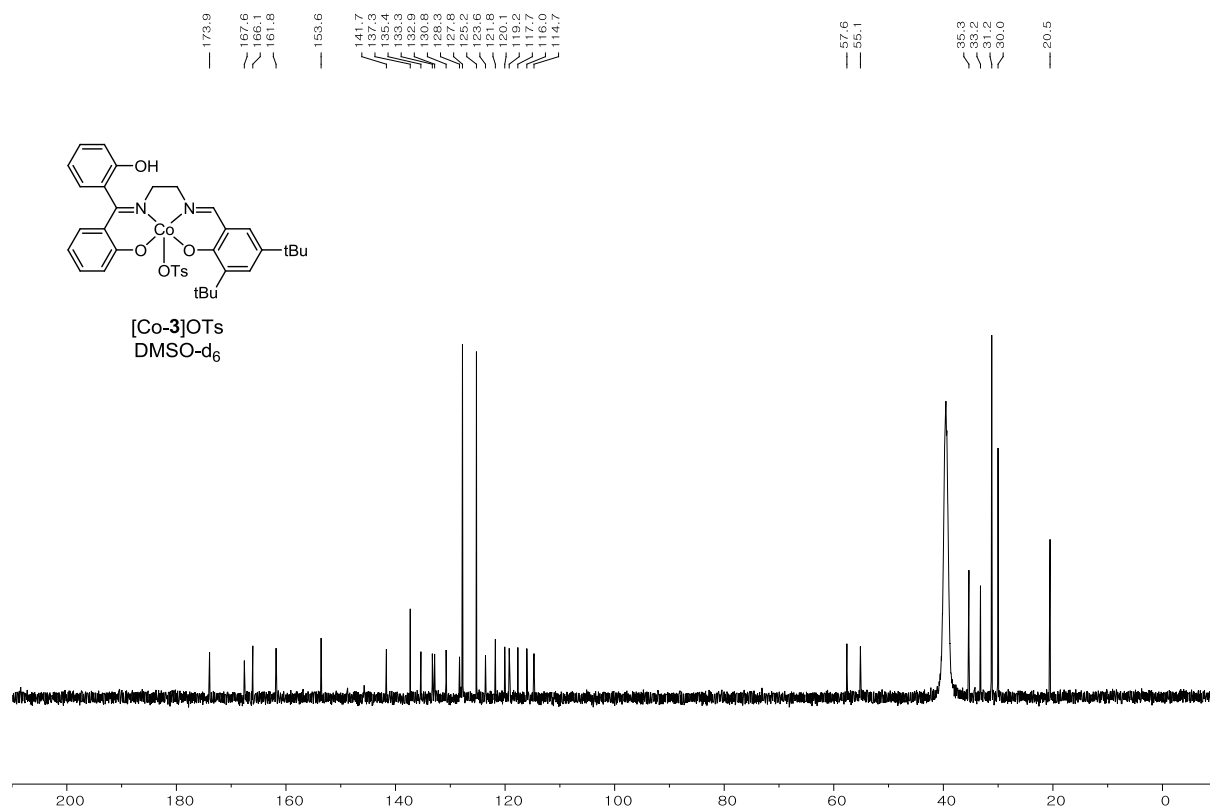

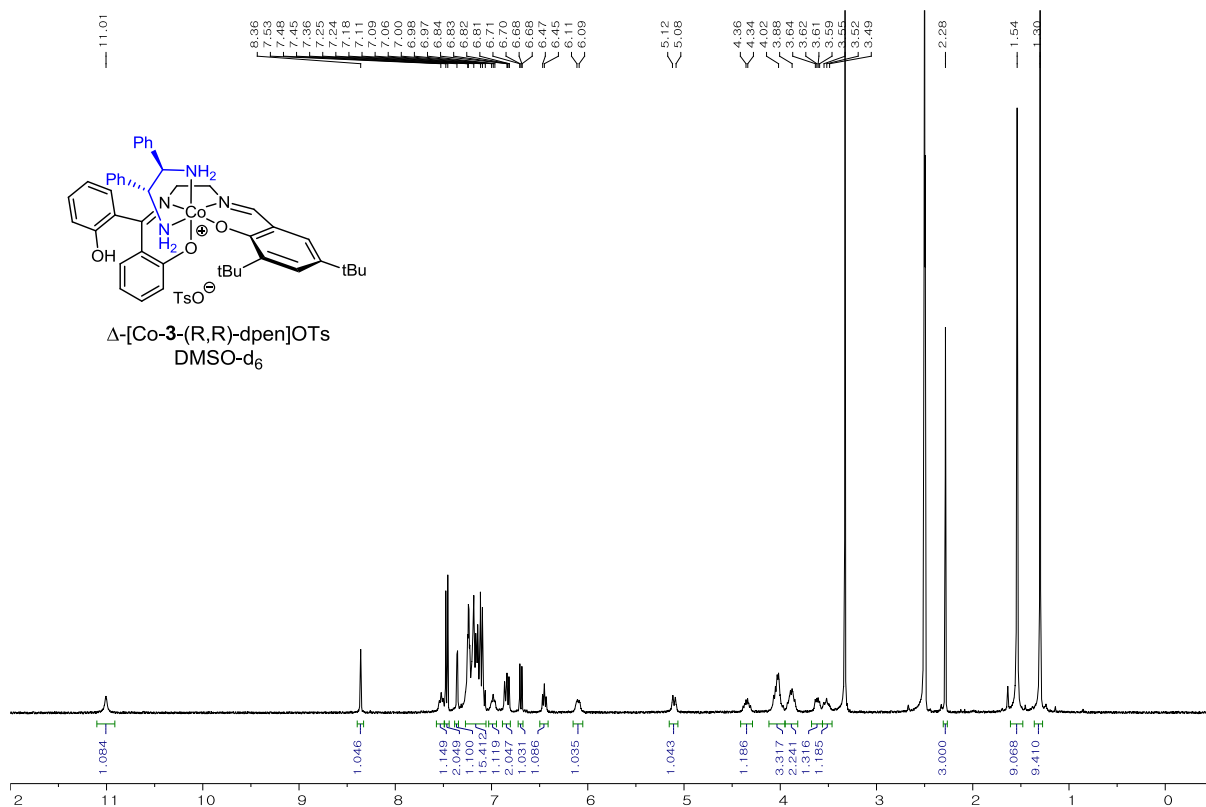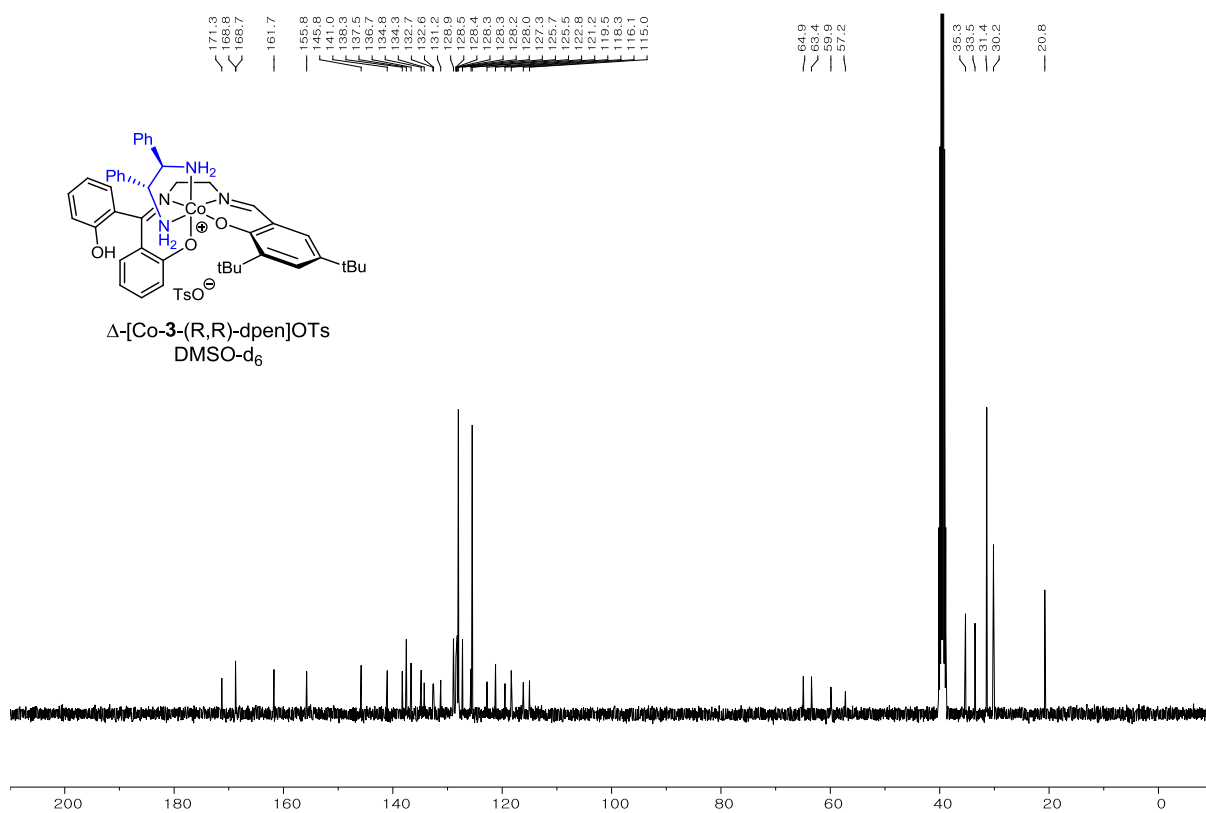

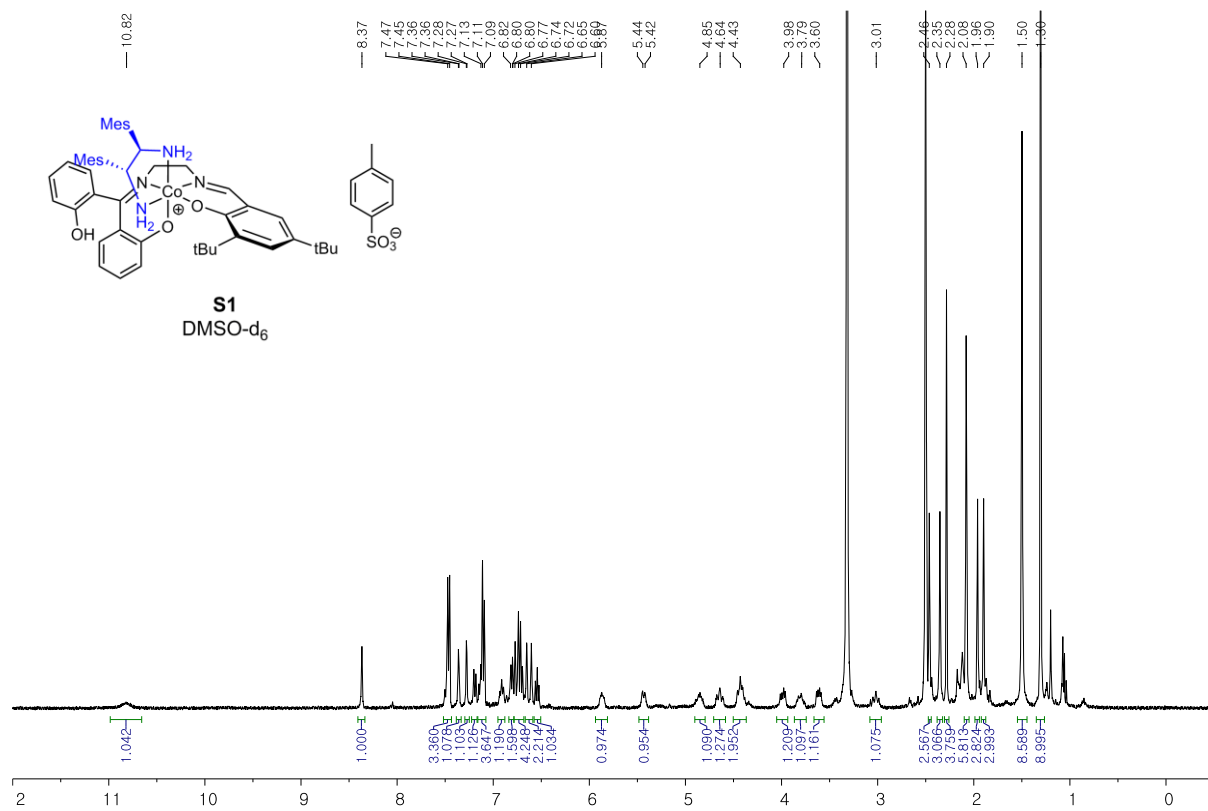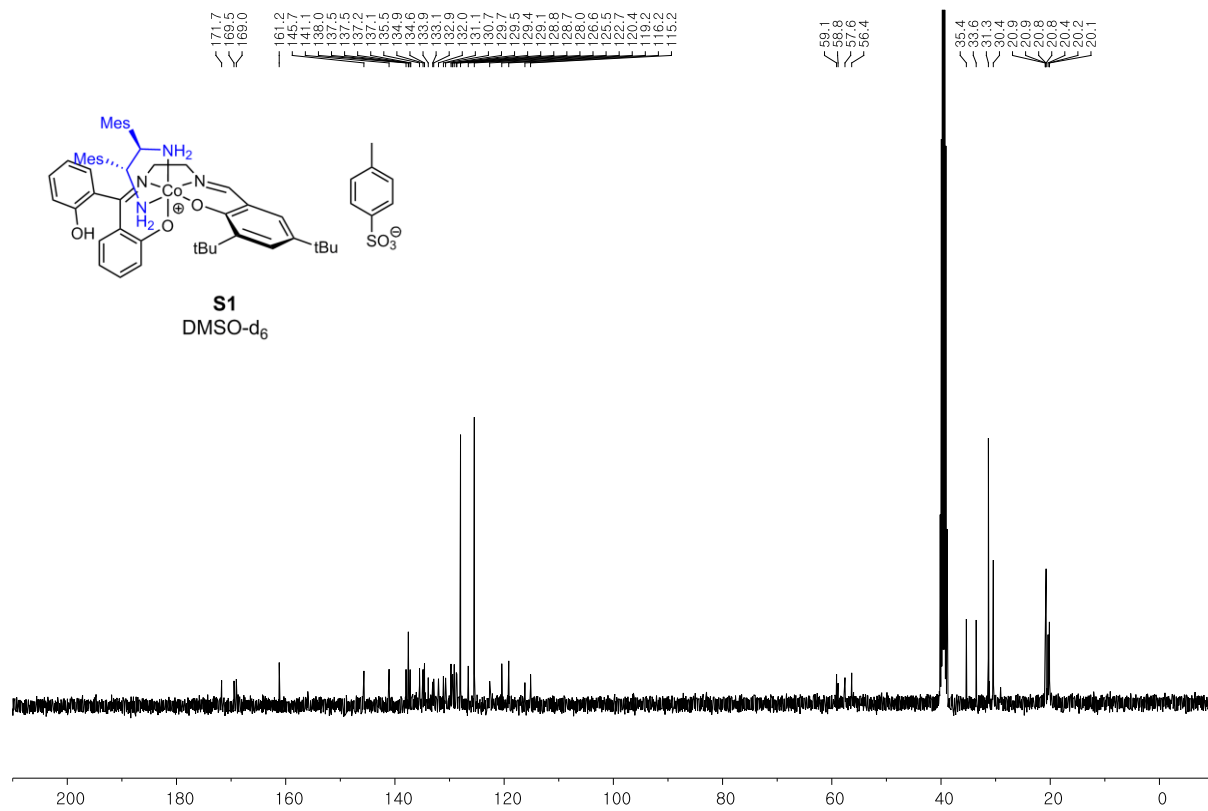

## IX. References

- [1] (a) H. Kim, Y. Nguyen, A. J. Lough, J. Chin, *J. Angew. Chem. Int. Ed.*, 2008, **47**, 8678. (b) H. Kim, Y. Nguyen, C. P.-H. Yen, L. Chagal, A. J. Lough, B. M. Kim, J. Chin, *J. Am. Chem. Soc.*, 2008, **130**, 12184.
- [2] Y. Gardikis, P. G. Tsoungas, C. Potamitis, M. Zervou, M. P. Cordopatis, *Heterocycles.*, 2011, **83**, 1077.
